# Supplementary material for: A visual ratiometric fluorescence sensor for glutathione response based on MnO2 nanowires as an oxidant, quencher and recognition unit
Source: Royal Society of Chemistry journal article supplement (doi:10.1039/d2ay01812h), 2023-01-01
Supplement: d2ay01812h1.pdf [file d2ay01812h1.pdf]

*Supplementary materials for*

**A visual ratiometric fluorescence sensor for glutathione response  
based on MnO<sub>2</sub> nanowires as oxidants, quencher and recognition  
unit**

Yu Fan<sup>a,1</sup>, Xin Wang<sup>a,1</sup>, He Huang<sup>a</sup>, Yumeng Yang<sup>a</sup>, Jinlin Guo<sup>a,c</sup>, Shajie Luo<sup>a\*</sup>,

Meilian Zhao<sup>b\*</sup>, Yang Li<sup>b\*</sup>

<sup>a</sup> *Chongqing Key Laboratory of Sichuan-Chongqing Co-Construction for Diagnosis and Treatment of Infectious Diseases Integrated Traditional Chinese and Western Medicine, College of Medical Technology, Chengdu University of Traditional Chinese Medicine, Chengdu 611137, China*

<sup>b</sup> *School of Public Health, Chengdu University of Traditional Chinese Medicine, Chengdu 611137, China*

<sup>c</sup> *State Key Laboratory of Southwestern Chinese Medicine Resources, School of Pharmacy, Chengdu University of Traditional Chinese Medicine, Chengdu 611137, China*

---

\* Corresponding author.

*E-mail address:* [liyong@cducm.edu.cn](mailto:liyong@cducm.edu.cn) (Y. Li), [zhaomeilian2009@126.com](mailto:zhaomeilian2009@126.com) (M. Zhao),  
[luoshajie@cducm.edu.cn](mailto:luoshajie@cducm.edu.cn) (S. Luo)

<sup>1</sup> Co-first author.

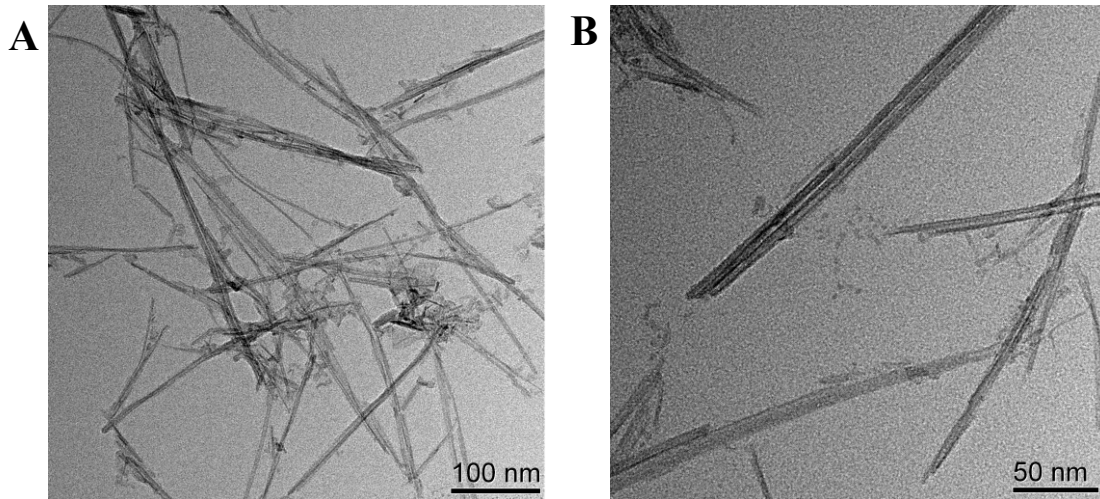

**Fig. S1.** (A) and (B) The TEM image of the as-prepared MnO<sub>2</sub> NWs.

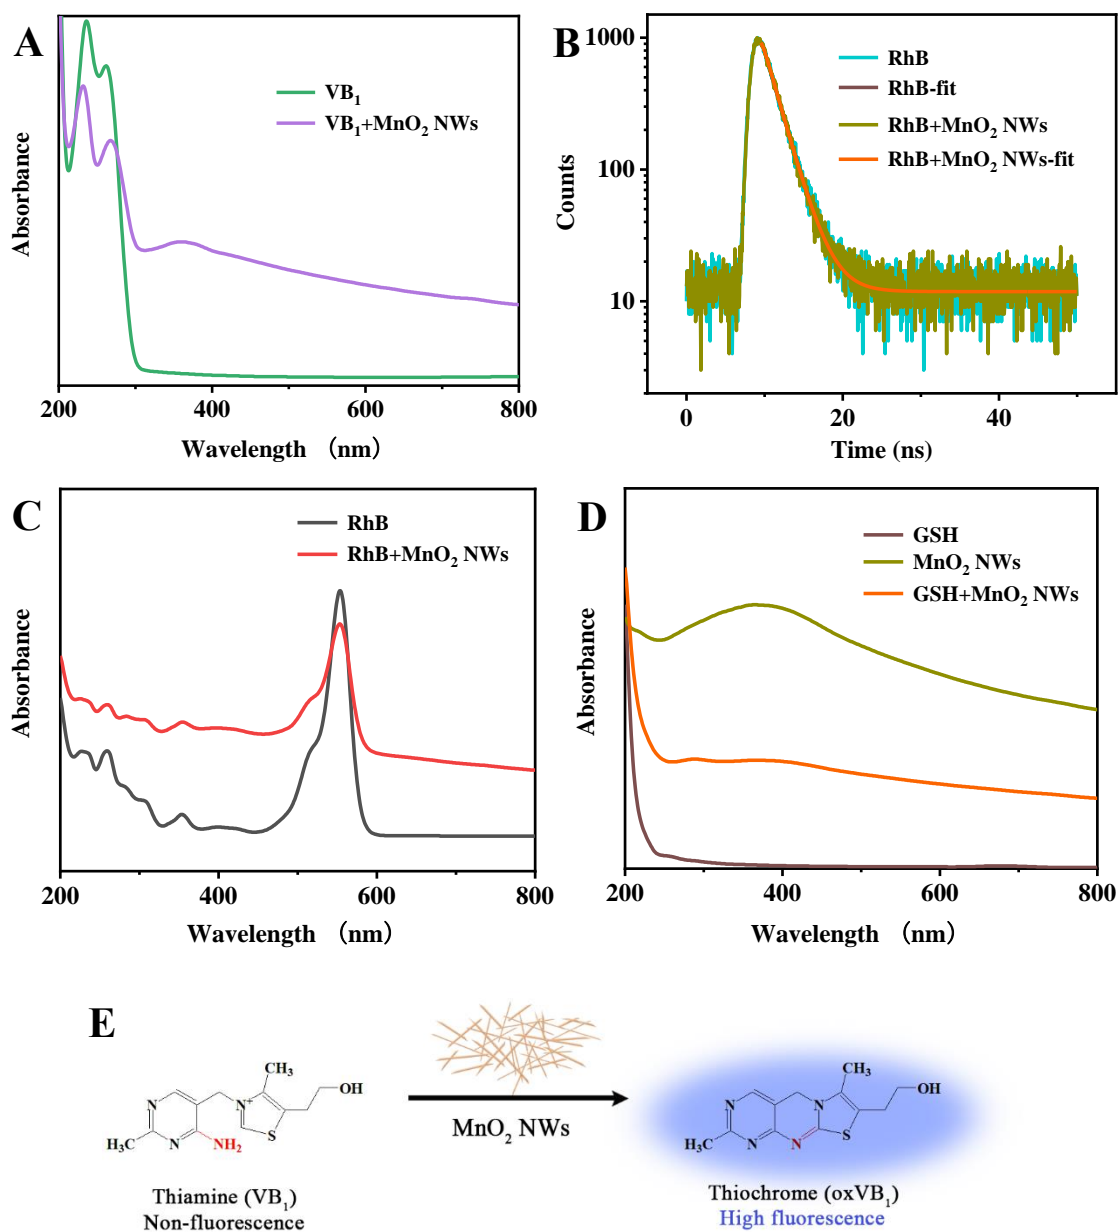

**Fig.S2.** (A) UV-vis absorption spectrum of VB<sub>1</sub> and VB<sub>1</sub> + MnO<sub>2</sub> NWs; (B) The time-resolved fluorescence decay curve of RhB and RhB + MnO<sub>2</sub> NWs; (C) UV-vis absorption spectrum of RhB and RhB + MnO<sub>2</sub> NWs; (D) UV-vis absorption spectrum of GSH, MnO<sub>2</sub> NWs and GSH + MnO<sub>2</sub> NWs; (E) Schematic illustration of VB<sub>1</sub> being oxidized by MnO<sub>2</sub> NWs to oxVB<sub>1</sub>.

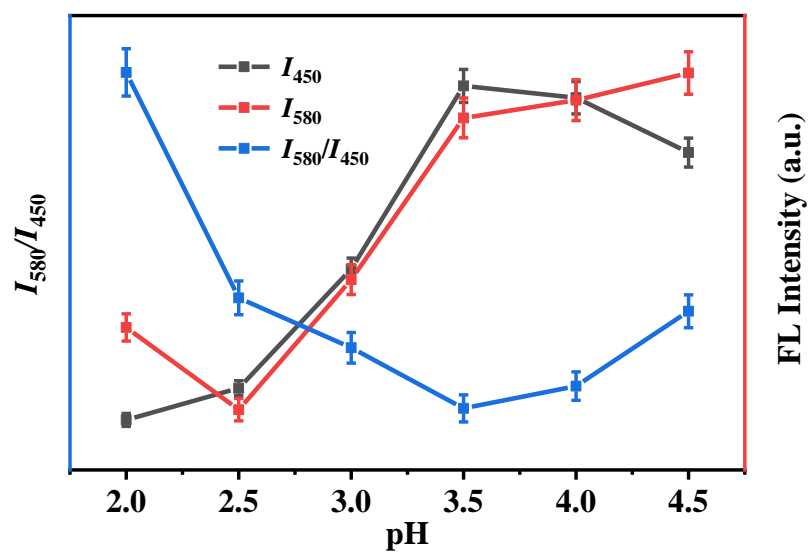

**Fig. S3.** Effects of pH on the ratiometric fluorescent sensor. Plots of  $I_{450}$ ,  $I_{580}$ , and the ratio value

$I_{580}/I_{450}$  versus pH, respectively.

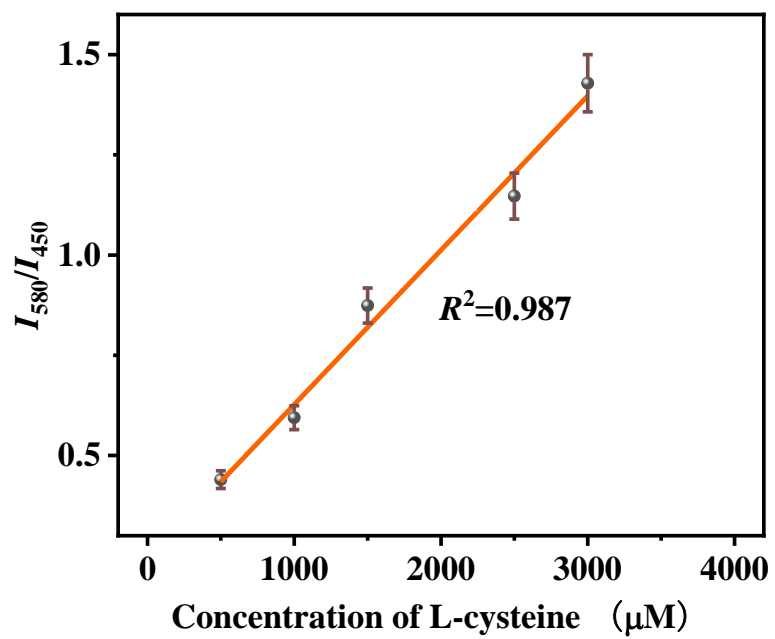

**Fig.S4.** The linear relationship between the ratio value  $I_{580}/I_{450}$  and L-cysteine concentrations from 500 to 3000  $\mu\text{M}$ .

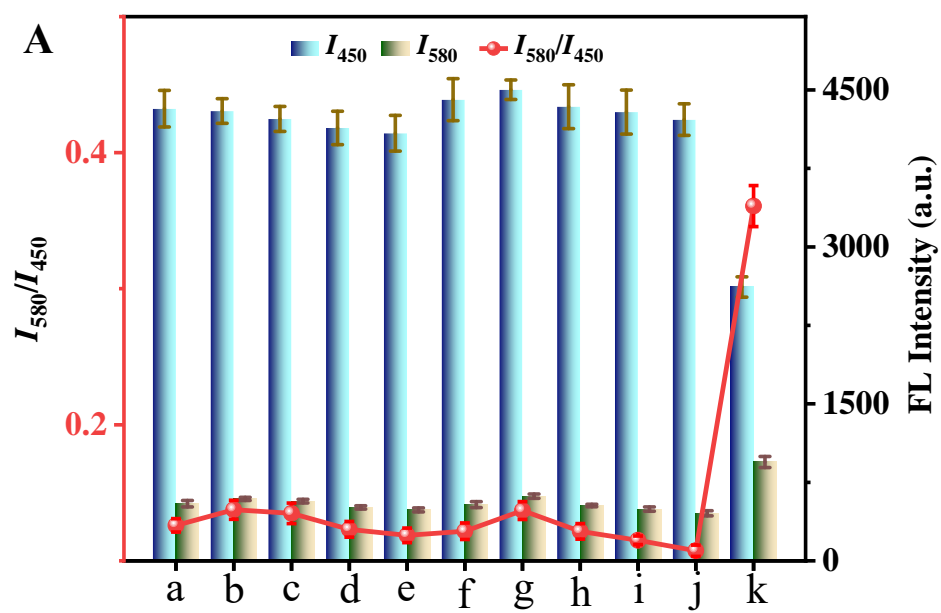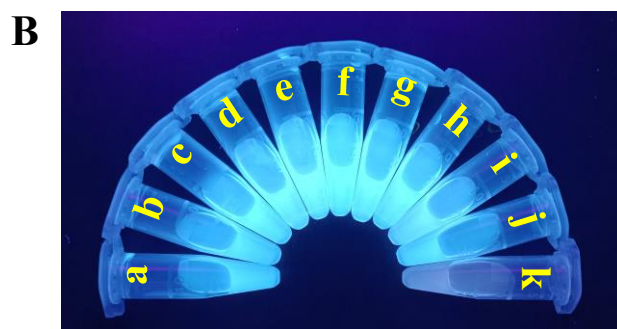

**Fig. S5.** (A) Selectivity of the ratiometric fluorescent sensor, a: l-alanine, b: l-phenylalanine, c: proline, d: methionine, e: glucose, f: NaCl, g: KCl, h: NaHCO<sub>3</sub>, i: NaH<sub>2</sub>PO<sub>4</sub>, j: H<sub>2</sub>O and k: GSH.

(B) Photographs of the ratiometric fluorescent sensor under UV light after addition of different substances.

**Table S1** Recovery results of GSH in real samples.

| Sample                 | Added ( $\mu\text{M}$ ) | Detected <sup>a</sup> ( $\mu\text{M}$ ) | Recovery (%) |
|------------------------|-------------------------|-----------------------------------------|--------------|
| whitening<br>capsules  | 0                       | $475.9 \pm 10.5$                        | –            |
|                        | 500                     | $998.8 \pm 10.6$                        | 104.6        |
|                        | 1000                    | $1481 \pm 11.2$                         | 100.5        |
| glutathione<br>tablets | 0                       | $490.0 \pm 7.7$                         | –            |
|                        | 500                     | $1037 \pm 11.3$                         | 109.4        |
|                        | 1000                    | $1546 \pm 12.3$                         | 105.6        |

<sup>a</sup> Average of three determination  $\pm$  SD, n=3

**Table S2** Applications of the prepared sensor to the real sample in contrast to HPLC.

| Sample              | Present work ( $\mu\text{M}$ ) | HPLC ( $\mu\text{M}$ ) |
|---------------------|--------------------------------|------------------------|
| whitening capsules  | $475.9 \pm 10.5$               | $483.9 \pm 3.9$        |
| glutathione tablets | $490.0 \pm 7.7$                | $487.3 \pm 6.5$        |
